# Supplementary material for: Smooth Muscle Phenotype in Idiopathic Pulmonary Hypertension: Hyper-Proliferative but not Cancerous
Source: PubMed Central journal article supplement (PMC6679125; doi:10.3390/ijms20143575), 2019-07-22
Supplement: ijms-20-03575-s001.pdf [file ijms-20-03575-s001.pdf]

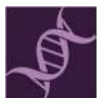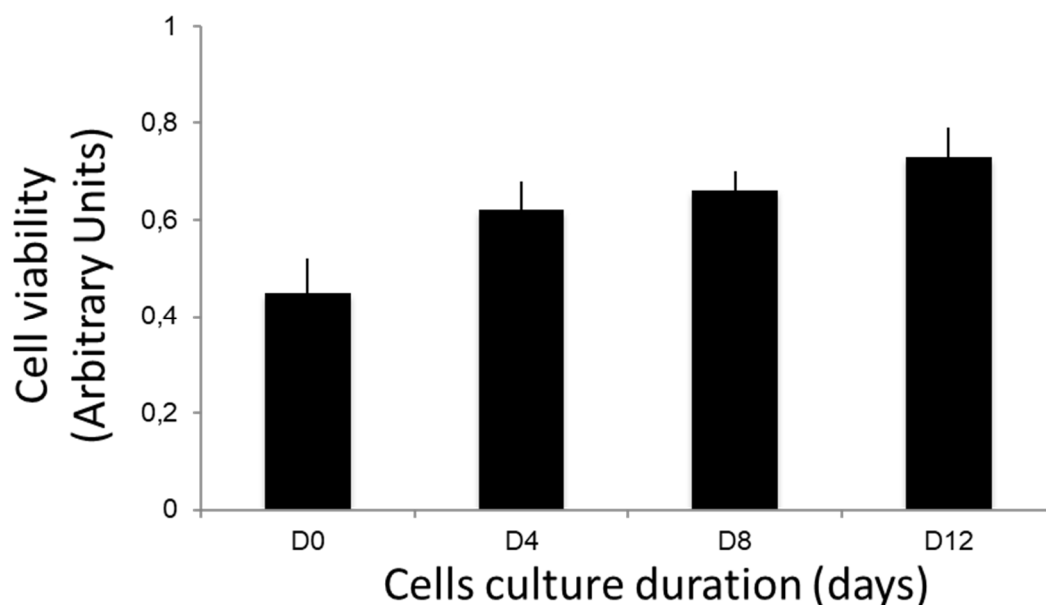

1  
2  
3  
4  
5  
6  
7

**Figure S1.** Cancer cells display self-sufficient proliferation. Human breast cancer cells line MDA-MB-231 were seeded in 12-well plates in 1% FCS/DMEM at a density of  $10^5$  cells/well and allowed to adhere for 24 h. The medium was subsequently removed, and the cells were subjected to serum-free DMEM for 4, 8 and 12 days. At the end of each period of incubation, the cells were dissociated by trypsin and counted by using a Muse Cell Analyzer following the manufacturer's instructions (Merck).

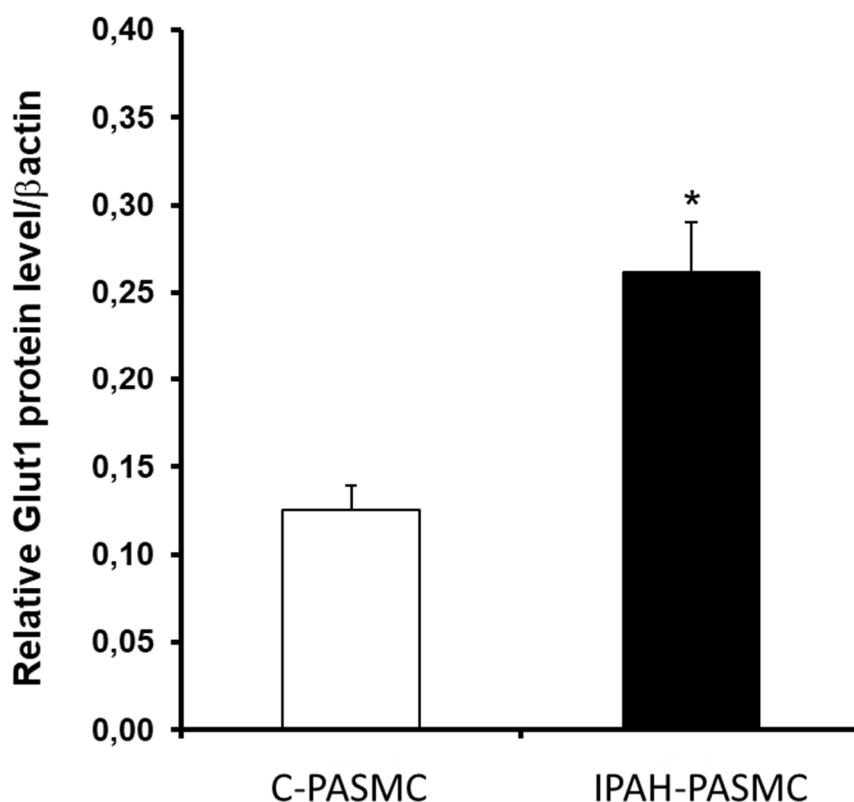

8

9        **Figure S2.** Overexpression of glucose transporter Glut1 in IPAH-PASMC. PASMC from controls and  
10 from IPAH patients were lysed as described in method section. Forty  $\mu\text{g}$  proteins were separated in  
11 10% sodium dodecyl sulfate polyacrylamide gel electrophoresis and transferred to nitrocellulose  
12 membranes. Glucose transporter (Glut1) was detected using rabbit polyclonal anti-Glut1 (ab15309,  
13 abcam, Paris, France). Then HRP conjugated anti-rabbit secondary antibody was used at a dilution of  
14 1:10000 (Calbiochem, Fontenay-Sous-Bois, France). Immunoreactive bands were visualized using  
15 chemiluminescence (ECL) (GE Healthcare) on a Bio-Rad Fluoro-S-Max Chemidoc system. A  
16 polyclonal antibody against  $\beta$ -actin (diluted 1:3000; Sigma Aldrich) served as the internal loading  
17 control. Densitometric quantification of the immunoblot bands was performed using Bio-Rad  
18 Quantity One software. Glut1 protein level was higher in IPAH than in controls PASMCs, \*  $p$   
19  $< 0.01$ .

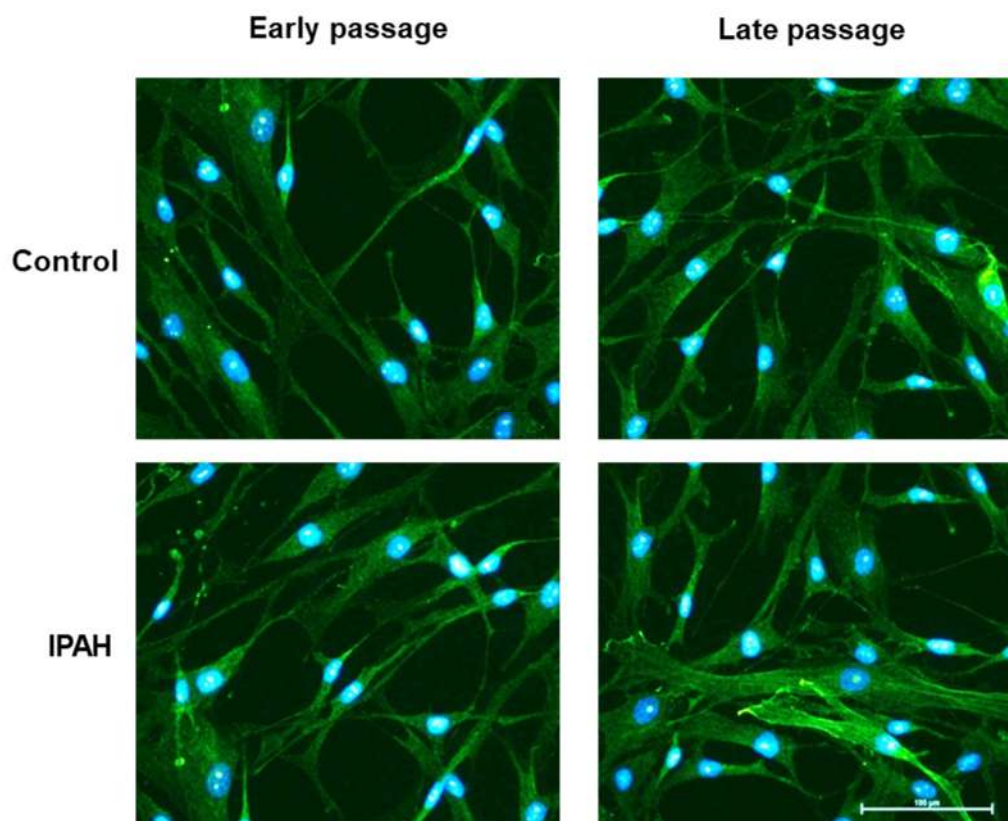

20

21

22

23

24

25

26

27

28

29

**Figure S3.** Immunofluorescence microscopy revealed stable expression of the smooth muscle cell marker SM22 by cultured control and IPAH PSMCs from early (P3) to late (P8) passages. Pulmonary artery smooth muscle cells (PASMC) from control and from IPAH patients were seeded in 6 well plates at a density of  $1 \times 10^5$  cells/well and allowed to grow in the same medium with 10%FCS for 24 h. The cells were washed twice with ice-cold (PBS), and fixed with methanol. After blocking with PBS containing 1% (w/v) bovine serum albumin (BSA) and 0.1% (v/v) Tween 20, the cells were incubated at 4°C overnight with anti-human SM22 antibody (1/200, Abcam). Fluorescein-conjugated IgG (Vector Laboratories, Inc.) was used as the secondary antibody. Nuclear counterstaining using DAPI (Sigma-Aldrich) was performed according to the manufacturer's recommendations.
